---

## Correction

*The role of ATP in the reactions of type II DNA topoisomerases*

By ANDREW D. BATES and ANTHONY MAXWELL

Volume 38 Part 2 (2010) 438–442

In the legend to Figure 2, incorrect symbols were assigned to the two lines. The first part of the legend should read:

Calculated topoisomer mole fractions (corresponding to relative intensities on an agarose gel) are plotted against the nominal linking difference ( $\Delta Lk$ ) of the topoisomer ( $i$ ) for an equilibrated relaxed distribution (◆) and a narrowed steady-state distribution ( $R' = 1.8$ ), as produced by a type II topoisomerase + ATP (■).

The symbols in the Figure itself are correct.
